# Supplementary material
Source: PubMed Central journal article supplement (PMC5639934)
Supplement: NIHMS907983-supplement-Supplemental_Figs_1_2_Sup__Table_S1.pdf [file NIHMS907983-supplement-Supplemental_Figs_1_2_Sup__Table_S1.pdf]

## **Inhibiting amyloid $\beta$ -protein assembly: Size-activity relationships among grape seed-derived polyphenols**

***Eric Y. Hayden<sup>#, 1</sup>, Ghiam Yamin<sup>#, 1, 2, 3</sup>, Shiela Beroukhim<sup>1</sup>, Benson Chen<sup>1</sup>, Mikhail Kibalchenko<sup>1</sup>, Lin Jiang<sup>1</sup>, Lap Ho<sup>4</sup>, Jun Wang<sup>4,5</sup>, Giulio M. Pasinetti<sup>4,5</sup> and David B. Teplow<sup>\*, 1, 6</sup>***

<sup>1</sup>Department of Neurology, David Geffen School of Medicine, University of California, Los Angeles, CA

<sup>2</sup>Medical Scientist Training Program, Neuroscience Interdepartmental Ph.D. Program, University of California, Los Angeles, CA 90095

<sup>4</sup>Departments of Psychiatry and Neuroscience, Icahn School of Medicine at Mount Sinai, NY, NY 10029

<sup>5</sup>Department of Neurology, Icahn School of Medicine at Mount Sinai, One Gustave L. Levy Place, New York, NY, Geriatric Research, Education and Clinical Center (GRECC), James J. Peters Veterans Affairs Medical Center, 130 West Kingsbridge Road, Bronx, NY

<sup>6</sup>Molecular Biology Institute (MBI), and Brain Research Institute (BRI), David Geffen School of Medicine, University of California, Los Angeles, CA 90095

<sup>#</sup>These authors contributed equally to this work.

<sup>3</sup>Present address: Department of Radiology, University of California, San Diego

\*Correspondence should be addressed to: David B. Teplow, Tel.: 310-206-2030, Fax: 310-206-1700, E-mail: [dteplow@mednet.ucla.edu](mailto:dteplow@mednet.ucla.edu)

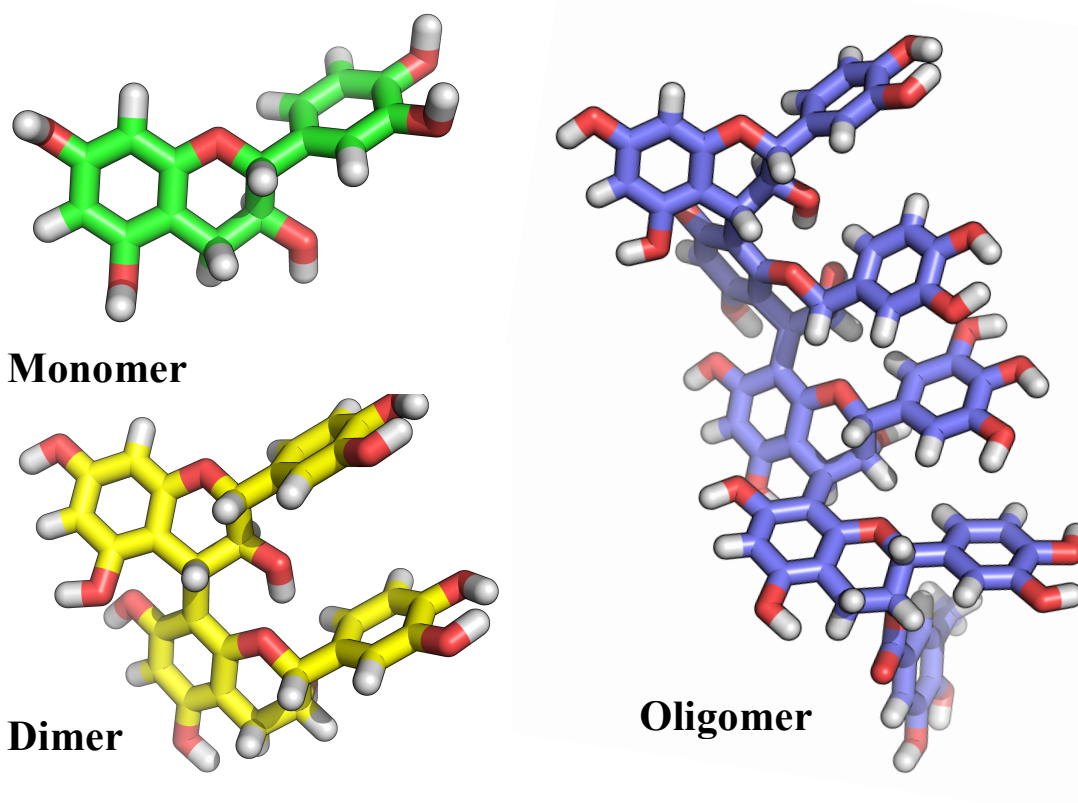

**Fig. S1. Three-dimensional structures of the GSPE monomer, dimer, and oligomer, shown in Fig. 1. Monomer (green), dimer (yellow), and oligomer (purple) are shown as stick models with oxygen atoms shown in red and hydrogen atoms shown in white.**

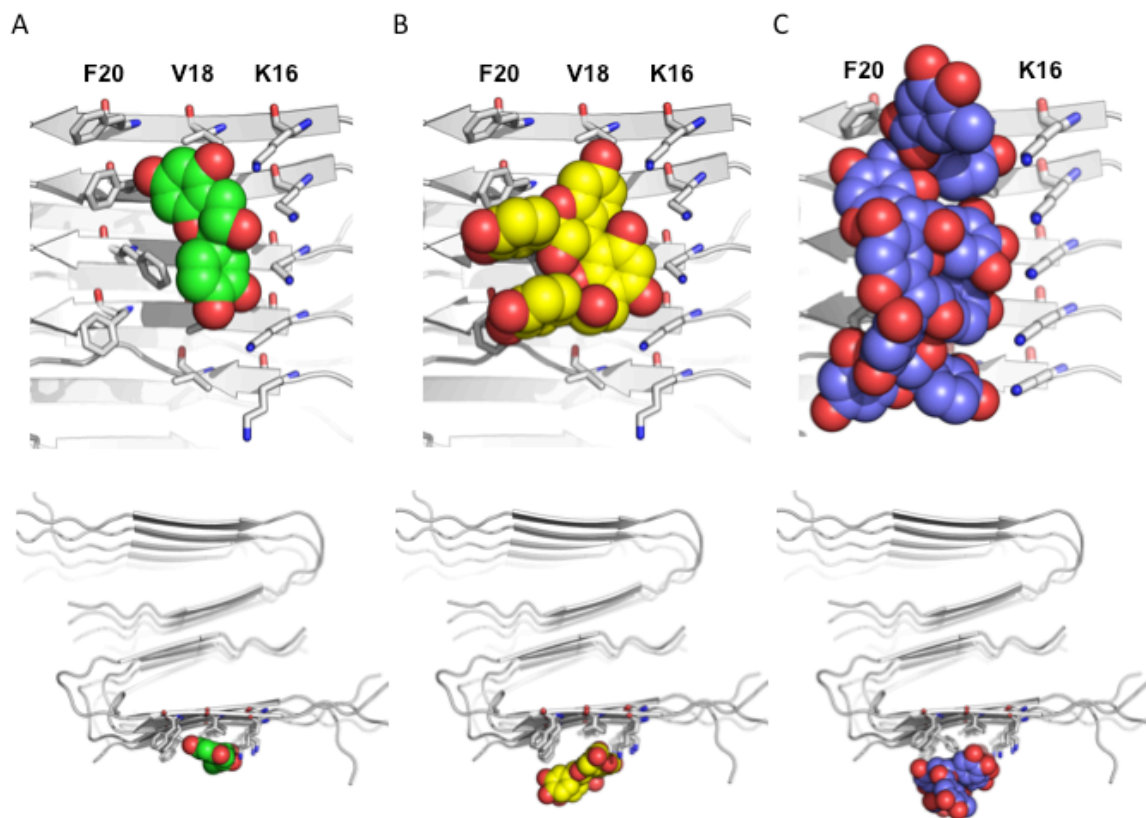

**Fig. S2. Structural models of GSPE:fibril interactions.** Monomer (A), dimer (B), and oligomer (C) are docked on an A $\beta$  fibril (grey) whose fibril axis extends from the bottom to the top of the figure (top row of figures). These same interactions are viewed looking down the fibril axis in the bottom row of figures. A $\beta$  fibril side-chains are shown in stick representation.

**Table S1. Energetics of GSPE:A $\beta$  complexation<sup>a</sup>**

| <b>GSPE</b>     | <b>Binding Energy</b> | <b>Non-bond Potential<sup>b</sup></b> | <b>Solvation Energy<sup>c</sup></b> | <b>Electrostatic Potential<sup>d</sup></b> | <b>H-bond Energy<sup>e</sup></b> |
|-----------------|-----------------------|---------------------------------------|-------------------------------------|--------------------------------------------|----------------------------------|
| <b>Monomer</b>  | -9                    | -9                                    | 3                                   | -1                                         | -2                               |
| <b>Dimer</b>    | -10                   | -13                                   | 5                                   | 0                                          | -1                               |
| <b>Oligomer</b> | -18                   | -23                                   | 10                                  | -1                                         | -4                               |

**Table S1.** Energetics of GSPE:A $\beta$  complexation. A comparison of the predicted binding energy and physically meaningful energy terms of each model.

<sup>a</sup>- Energies are listed as kcal/mol.

<sup>b</sup>- The attractive portion of the non-bonded Lennard-Jones potential (1).

<sup>c</sup>- LK implicit solvation energy (2).

<sup>d</sup>- Simple Coulombic electrostatics (1).

<sup>e</sup>- Interfacial hydrogen binding energy (3).

1. Brooks B.R., Bruccoleri R.E., Olafson B.D., States D.J., Swaminathan S. (1983) CHARMM: a program for macromolecular energy, minimization, and dynamics calculations. *J Comp Chem*, **4**, 187-217.

2. Lazaridis T, Karplus M. (1999) Effective energy function for proteins in solution. *Proteins*, **35**, 133-152.

3. Kortemme T, Morozov AV, Baker D. (2003) An orientation-dependent hydrogen bonding potential improves prediction of specificity and structure for proteins and protein–protein complexes. *J Mol Biol* **326**, 1239-1259.
